# Supplementary material
Source: publisher site journal article supplement (https://www.dovepress.com/article/344489)
Supplement: Supplementary file 1 [file get_supplementary_file.php]

S1 Fig

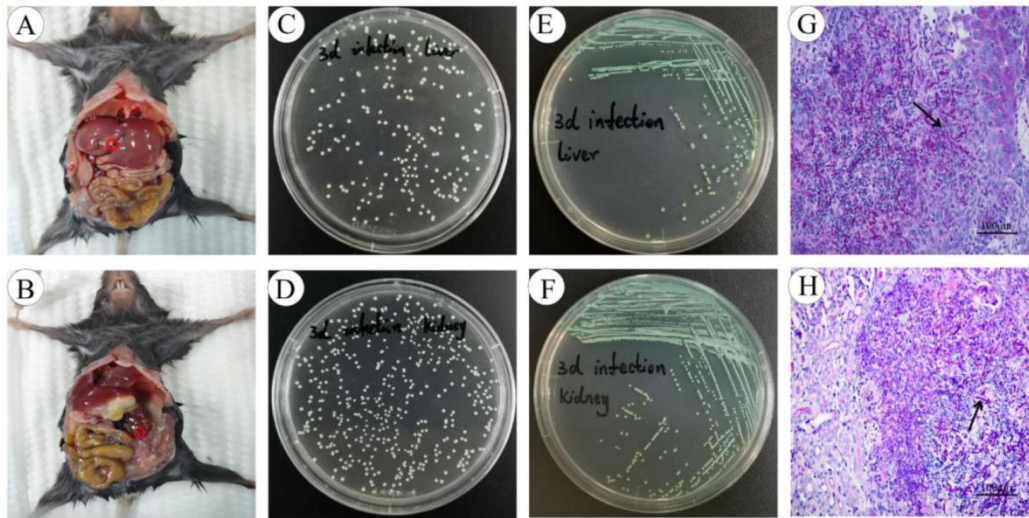

**S1 Fig.** Generation of a mouse model of *C. albicans* infection

(A) Mouse liver infection focus. (B) Mouse kidney infection focus. (C) Plating liver tissue in Sabouraud's medium. (D) Plating kidney tissue in Sabouraud's medium. (E) Identification of *C. albicans* isolated from the liver. (F) Identification of *C. albicans* isolated from the kidney. (G) Periodic acid-Schiff (PAS) staining and microscopic examination of liver tissue ( $\times 400$  magnification, scale bar =  $100\mu\text{m}$ ). (H) PAS staining and microscopic examination of kidney tissue ( $\times 400$  magnification, scale bar =  $100\mu\text{m}$ ). Arrows indicate representative *C. albicans* hyphae.

S2 Fig

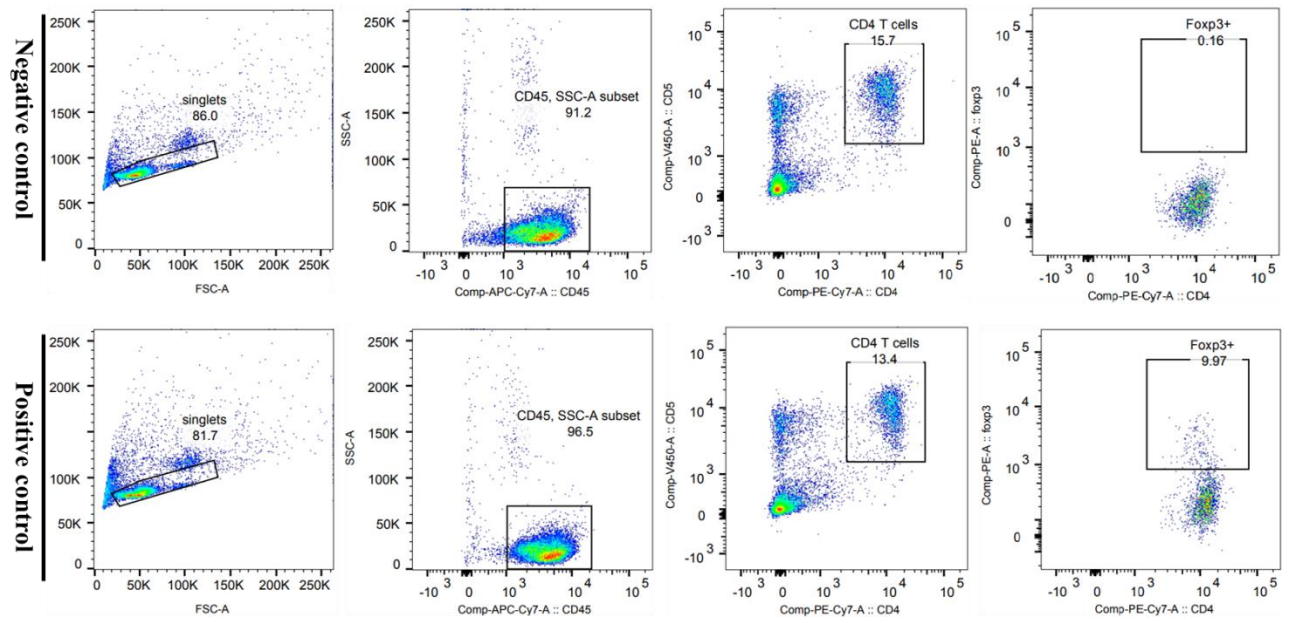

S2 Fig. The gating strategy of Treg cells in flow cytometry.

Negative control: Without Foxp3 antibodies. Positive control: With Foxp3 antibodies.
